# Supplementary material for: CHARMM force field parameterization protocol for self-assembling peptide amphiphiles: the Fmoc moiety
Source: Royal Society of Chemistry journal article supplement (doi:10.1039/c5cp06770g), 2016-01-01
Supplement: c5cp06770g1.pdf [file c5cp06770g1.pdf]

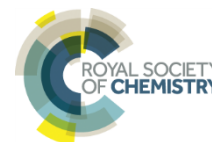

Journal Name

ARTICLE

ESI for:

Received 00th January 20xx,  
Accepted 00th January 20xx

DOI: 10.1039/x0xx00000x

[www.rsc.org/](http://www.rsc.org/)

## CHARMM force field parameterization protocol for self-assembling peptide amphiphiles: The Fmoc moiety

I. Ramos Sasselli,<sup>a</sup> R. V. Ulijn<sup>a,b</sup> and T. Tuttle<sup>a,\*</sup>

<sup>a</sup> *Pure and Applied Chemistry Department, WestCHEM. University of Strathclyde, 295 Cathedral Street, Glasgow, G1 1XL, UK.*

<sup>b</sup> *Advanced Science Research Center (ASRC) and Hunter College, City University of New York, 85 St Nicholas Terrace, New York, New York 10031, USA.*

\* E-mail: [tell.tuttle@strath.ac.uk](mailto:tell.tuttle@strath.ac.uk)

Here the topology and parameters information of the Fmoc moiety for the CHARMM force field is included in the NAMD format:

### CHARMM TOPOLOGY (NAMD Format)

```
!hydrogens
MASS 1 HGA2 1.00800
MASS 2 HGR61 1.00800
!carbons
MASS 3 CG201 12.01100
MASS 4 C2R61 12.01100
MASS 5 CG2R66 12.01100
MASS 6 C2R67 12.01100
MASS 7 C2RC0 12.01100
MASS 8 CG321 12.01100
MASS 9 C3C52 12.01100
!oxygens
MASS 10 OG2D1 15.99940
MASS 11 OG302 15.99940
```

```
DEFA FIRS NONE LAST NONE
AUTO ANGLES DIHE
```

```
RESI FMO 0.00
```

#### GROUP

```
ATOM C1 C2R61 -0.110 !
ATOM H1 HGR61 0.135 !
ATOM C2 C2R61 -0.110 !
ATOM H2 HGR61 0.135 !
ATOM C3 C2R61 -0.110 !
ATOM H3 HGR61 0.135 !
ATOM C4 C2R61 -0.110 !
ATOM H4 HGR61 0.135 !
ATOM C5 C2R67 -0.100 !
ATOM C6 C2R67 -0.100 !
ATOM C7 C2R61 -0.110 !
ATOM H7 HGR61 0.135 !
ATOM C8 C2R61 -0.110 !
ATOM H8 HGR61 0.135 !
ATOM C9 C2R61 -0.110 !
ATOM H9 HGR61 0.135 !
ATOM C10 C2R61 -0.110 !
ATOM H10 HGR61 0.135 !
ATOM C11 C2RC0 -0.050 !
ATOM C12 C3C52 0.150
ATOM H21 HGA2 0.090
ATOM C13 C2RC0 -0.050
```

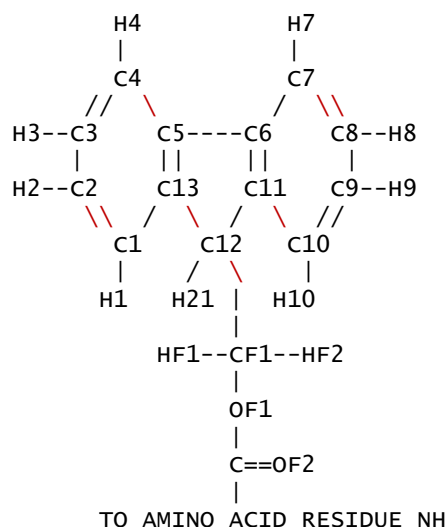

#### GROUP

```
ATOM CF1 CG321 0.240
ATOM HF1 HGA2 0.220
ATOM HF2 HGA2 0.220
ATOM OF1 OG302 -0.920
ATOM C CG201 0.950
ATOM OF2 OG2D1 -0.850
```

```
BOND C1 C2 C2 C3 C3 C4 C4 C5 C5 C6
BOND C6 C7 C7 C8 C8 C9 C9 C10 C10 C11
BOND C11 C12 C12 C13 C13 C1 C5 C13 C6 C11
BOND C1 H1 C2 H2 C3 H3 C4 H4 C7 H7
BOND C8 H8 C9 H9 C10 H10 C12 H21 C12 CF1
BOND CF1 HF1 CF1 HF2 CF1 OF1 OF1 C
DOUBLE C OF2
BOND C +N
```

|        |     |      |     |        |      |         |      |        |
|--------|-----|------|-----|--------|------|---------|------|--------|
| IC C5  | C13 | C1   | C2  | 0.0000 | 0.00 | 0.00    | 0.00 | 0.0000 |
| IC C1  | C13 | C5   | C4  | 0.0000 | 0.00 | 0.00    | 0.00 | 0.0000 |
| IC C13 | C5  | C4   | C3  | 0.0000 | 0.00 | 0.00    | 0.00 | 0.0000 |
| IC C1  | C5  | *C13 | C12 | 0.0000 | 0.00 | 180.00  | 0.00 | 0.0000 |
| IC C4  | C13 | *C5  | C6  | 0.0000 | 0.00 | 180.00  | 0.00 | 0.0000 |
| IC C13 | C5  | C6   | C11 | 0.0000 | 0.00 | 5.00    | 0.00 | 0.0000 |
| IC C5  | C11 | *C6  | C7  | 0.0000 | 0.00 | 180.00  | 0.00 | 0.0000 |
| IC C7  | C6  | C11  | C10 | 0.0000 | 0.00 | 0.00    | 0.00 | 0.0000 |
| IC C11 | C6  | C7   | C8  | 0.0000 | 0.00 | 0.00    | 0.00 | 0.0000 |
| IC C6  | C11 | C10  | C9  | 0.0000 | 0.00 | 0.00    | 0.00 | 0.0000 |
| IC C13 | C2  | *C1  | H1  | 0.0000 | 0.00 | 180.00  | 0.00 | 0.0000 |
| IC C1  | C3  | *C2  | H2  | 0.0000 | 0.00 | 180.00  | 0.00 | 0.0000 |
| IC C2  | C4  | *C3  | H3  | 0.0000 | 0.00 | 180.00  | 0.00 | 0.0000 |
| IC C3  | C5  | *C4  | H4  | 0.0000 | 0.00 | 180.00  | 0.00 | 0.0000 |
| IC C6  | C8  | *C7  | H7  | 0.0000 | 0.00 | 180.00  | 0.00 | 0.0000 |
| IC C7  | C9  | *C8  | H8  | 0.0000 | 0.00 | 180.00  | 0.00 | 0.0000 |
| IC C8  | C10 | *C9  | H9  | 0.0000 | 0.00 | 180.00  | 0.00 | 0.0000 |
| IC C9  | C11 | *C10 | H10 | 0.0000 | 0.00 | 180.00  | 0.00 | 0.0000 |
| IC C11 | C13 | *C12 | H21 | 0.0000 | 0.00 | 120.00  | 0.00 | 0.0000 |
| IC C11 | C13 | *C12 | CF1 | 0.0000 | 0.00 | -120.00 | 0.00 | 0.0000 |
| IC C12 | CF1 | C11  | C10 | 0.0000 | 0.00 | 180.00  | 0.00 | 0.0000 |
| IC C12 | CF1 | C13  | C1  | 0.0000 | 0.00 | 180.00  | 0.00 | 0.0000 |
| IC CF1 | C11 | *C12 | C13 | 0.0000 | 0.00 | 120.00  | 0.00 | 0.0000 |
| IC OF1 | CF1 | C12  | HF1 | 0.0000 | 0.00 | 180.00  | 0.00 | 0.0000 |
| IC OF1 | HF2 | *CF1 | C12 | 0.0000 | 0.00 | 180.00  | 0.00 | 0.0000 |
| IC OF2 | +N  | *C   | OF2 | 0.0000 | 0.00 | 180.00  | 0.00 | 0.0000 |
| IC +N  | C   | OF1  | CF1 | 0.0000 | 0.00 | 180.00  | 0.00 | 0.0000 |
| IC C   | OF1 | CF1  | HF1 | 0.0000 | 0.00 | 0.00    | 0.00 | 0.0000 |
| IC C   | OF1 | CF1  | HF2 | 0.0000 | 0.00 | 120.00  | 0.00 | 0.0000 |
| IC C   | OF1 | CF1  | C12 | 0.0000 | 0.00 | 240.00  | 0.00 | 0.0000 |

**PARAMETERS (NAMD Format)**

## BONDS

|       |       |        |        |
|-------|-------|--------|--------|
| C2R61 | HGR61 | 340.00 | 1.0800 |
| C2R61 | C2R61 | 305.00 | 1.3750 |
| C2R61 | C2R67 | 305.00 | 1.3750 |
| C2R61 | C2RC0 | 300.00 | 1.3600 |
| C2R67 | C2R67 | 300.00 | 1.4900 |
| C2R67 | C2RC0 | 300.00 | 1.4200 |
| C2RC0 | C3C52 | 305.00 | 1.5200 |
| C3C52 | HGA2  | 307.00 | 1.1000 |
| CG321 | C3C52 | 195.00 | 1.5180 |
| CG321 | HGA2  | 309.00 | 1.1110 |
| CG321 | OG302 | 320.00 | 1.4400 |
| CG201 | OG302 | 340.00 | 1.4300 |
| CG201 | OG2D1 | 620.00 | 1.2300 |
| CG201 | NH1   | 370.00 | 1.3450 |
| NH1   | H     | 440.00 | 0.9970 |
| NH1   | CT1   | 320.00 | 1.4300 |
| CT1   | CD    | 200.00 | 1.5220 |
| CT2   | CT1   | 222.50 | 1.5380 |
| HB    | CT1   | 330.00 | 1.0800 |
| HA    | CT2   | 309.00 | 1.1110 |
| OH1   | CT2   | 428.00 | 1.4200 |
| OH1   | H     | 545.00 | 0.9600 |
| OB    | CD    | 750.00 | 1.2200 |
| OH1   | CD    | 230.00 | 1.4000 |

## ANGLES

|       |       |       |       |        |
|-------|-------|-------|-------|--------|
| CG201 | OG302 | CG321 | 55.00 | 109.00 |
| OG2D1 | CG201 | OG302 | 90.00 | 125.90 |
| C2RC0 | C3C52 | CG321 | 38.00 | 114.00 |
| C3C52 | CG321 | OG302 | 75.70 | 115.10 |
| C3C52 | CG321 | HGA2  | 38.50 | 115.10 |
| CG321 | C3C52 | HGA2  | 38.50 | 106.80 |

## ARTICLE

## Journal Name

|       |       |       |        |        |        |         |
|-------|-------|-------|--------|--------|--------|---------|
| NH1   | CG201 | OG302 | 80.00  | 116.50 |        |         |
| NH1   | CG201 | OG2D1 | 80.00  | 122.50 |        |         |
| CG201 | NH1   | H     | 34.00  | 123.00 |        |         |
| C2R61 | C2R61 | C2R61 | 40.00  | 120.00 | 35.00  | 2.41620 |
| C2R61 | C2R61 | C2R67 | 40.00  | 120.00 |        |         |
| C2R61 | C2R61 | C2RC0 | 50.00  | 120.00 |        |         |
| C2R61 | C2R61 | HGR61 | 30.00  | 120.00 | 22.00  | 2.15250 |
| C2R67 | C2R61 | HGR61 | 30.00  | 120.00 |        |         |
| C2RC0 | C2R61 | HGR61 | 30.00  | 120.00 | 22.00  | 2.14600 |
| C2R61 | C2R67 | C2R67 | 40.00  | 120.00 |        |         |
| C2R61 | C2R67 | C2RC0 | 50.00  | 120.00 |        |         |
| C2R67 | C2R67 | C2RC0 | 55.00  | 110.00 |        |         |
| C2R61 | C2RC0 | C2R67 | 50.00  | 120.00 |        |         |
| C2R61 | C2RC0 | C3C52 | 60.00  | 130.00 |        |         |
| C2R67 | C2RC0 | C3C52 | 110.00 | 110.00 |        |         |
| OG302 | CG321 | HGA2  | 60.00  | 109.50 |        |         |
| HGA2  | CG321 | HGA2  | 35.50  | 109.00 | 5.40   | 1.80200 |
| C2RC0 | C3C52 | C2RC0 | 40.00  | 95.00  |        |         |
| C2RC0 | C3C52 | HGA2  | 38.00  | 114.00 |        |         |
| HB    | CT1   | CD    | 50.00  | 109.50 |        |         |
| H     | OH1   | CD    | 55.00  | 115.00 |        |         |
| OB    | CD    | CT1   | 70.00  | 125.00 | 20.00  | 2.44200 |
| CT1   | CD    | OH1   | 55.00  | 110.50 |        |         |
| OH1   | CD    | OB    | 50.00  | 123.00 | 210.00 | 2.26200 |
| NH1   | CT1   | HB    | 48.00  | 108.00 |        |         |
| NH1   | CT1   | CD    | 50.00  | 107.00 |        |         |
| H     | NH1   | CT1   | 35.00  | 117.00 |        |         |
| HA    | CT2   | CT1   | 33.43  | 110.10 | 22.53  | 2.17900 |
| OH1   | CT2   | CT1   | 75.70  | 110.10 |        |         |
| CG201 | NH1   | CT1   | 50.00  | 120.00 |        |         |
| H     | OH1   | CT2   | 57.50  | 106.00 |        |         |
| HB    | CT1   | CT2   | 35.00  | 111.00 |        |         |
| CT2   | CT1   | CD    | 52.00  | 108.00 |        |         |
| HA    | CT2   | HA    | 35.50  | 109.00 | 5.40   | 1.80200 |
| OH1   | CT2   | HA    | 45.90  | 108.89 |        |         |
| NH1   | CT1   | CT2   | 70.00  | 113.50 |        |         |

## DIHEDRALS

|       |       |       |       |        |   |        |
|-------|-------|-------|-------|--------|---|--------|
| C2R61 | C2RC0 | C3C52 | CG321 | 0.5000 | 3 | 0.00   |
| C2R67 | C2RC0 | C3C52 | CG321 | 0.5000 | 3 | 0.00   |
| C2RC0 | C3C52 | CG321 | HGA2  | 0.1950 | 3 | 0.00   |
| C2RC0 | C3C52 | CG321 | OG302 | 0.1950 | 3 | 0.00   |
| C3C52 | CG321 | OG302 | CG201 | 0.0000 | 3 | 0.00   |
| HGA2  | C3C52 | CG321 | HGA2  | 0.1400 | 3 | 0.00   |
| HGA2  | C3C52 | CG321 | OG302 | 0.1400 | 3 | 0.00   |
| CG321 | OG302 | CG201 | OG2D1 | 0.9000 | 1 | 0.00   |
| CG321 | OG302 | CG201 | OG2D1 | 2.8500 | 2 | 180.00 |
| HGA2  | CG321 | OG302 | CG201 | 2.0500 | 2 | 180.00 |
| OG2D1 | CG201 | C2R61 | C2RC0 | 1.0000 | 2 | 180.00 |
| C2R61 | C2R61 | C2R61 | C2R61 | 3.1000 | 2 | 180.00 |
| C2R61 | C2R61 | C2R61 | C2R67 | 3.1000 | 2 | 180.00 |
| C2R61 | C2R61 | C2R61 | C2RC0 | 3.0000 | 2 | 180.00 |
| C2R61 | C2R61 | C2R61 | HGR61 | 4.2000 | 2 | 180.00 |
| C2R67 | C2R61 | C2R61 | HGR61 | 4.2000 | 2 | 180.00 |
| C2RC0 | C2R61 | C2R61 | HGR61 | 3.0000 | 2 | 180.00 |
| HGR61 | C2R61 | C2R61 | HGR61 | 2.4000 | 2 | 180.00 |
| C2R61 | C2R61 | C2R67 | C2R67 | 3.1000 | 2 | 180.00 |
| C2R61 | C2R61 | C2R67 | C2RC0 | 0.2500 | 2 | 180.00 |
| OG301 | C2R61 | C2R67 | C2R61 | 3.1000 | 2 | 180.00 |
| OG301 | C2R61 | C2R67 | C2R67 | 3.1000 | 2 | 180.00 |
| HGR61 | C2R61 | C2R67 | C2R61 | 4.2000 | 2 | 180.00 |
| HGR61 | C2R61 | C2R67 | C2R67 | 4.2000 | 2 | 180.00 |
| C2R61 | C2R61 | C2RC0 | C2R67 | 0.2500 | 2 | 180.00 |
| C2R61 | C2R61 | C2RC0 | C3C52 | 0.0000 | 2 | 180.00 |
| C2R61 | C2R61 | C2RC0 | C2R67 | 0.2500 | 2 | 180.00 |
| HGR61 | C2R61 | C2RC0 | C3C52 | 0.0000 | 2 | 180.00 |
| C2R61 | C2R67 | C2R67 | C2R61 | 0.8900 | 2 | 180.00 |
| C2R61 | C2R67 | C2R67 | C2RC0 | 2.0000 | 2 | 180.00 |
| C2RC0 | C2R67 | C2R67 | C2RC0 | 1.5000 | 2 | 180.00 |
| C2R61 | C2R67 | C2RC0 | C2R61 | 0.0500 | 2 | 180.00 |
| C2R61 | C2R67 | C2RC0 | C3C52 | 6.7500 | 2 | 180.00 |
| C2R67 | C2R67 | C2RC0 | C2R61 | 3.5000 | 2 | 180.00 |
| C2R67 | C2R67 | C2RC0 | C3C52 | 5.0000 | 3 | 180.00 |
| C2R61 | C2RC0 | C3C52 | C2RC0 | 0.9000 | 3 | 0.00   |
| C2R61 | C2RC0 | C3C52 | HGA2  | 0.5000 | 3 | 180.00 |
| C2R67 | C2RC0 | C3C52 | C2RC0 | 0.7500 | 3 | 180.00 |

|       |       |       |       |        |   |        |
|-------|-------|-------|-------|--------|---|--------|
| C2R67 | C2RC0 | C3C52 | HGA2  | 0.5000 | 3 | 0.00   |
| HGR61 | C2R61 | C2R67 | C2RC0 | 3.0000 | 2 | 180.00 |
| HGR61 | C2R61 | C2RC0 | C2R67 | 3.0000 | 2 | 180.00 |
| CG321 | OG302 | CG201 | NH1   | 0.6000 | 1 | 180.00 |
| CG321 | OG302 | CG201 | NH1   | 2.0000 | 2 | 180.00 |
| OG302 | CG201 | NH1   | H     | 2.5000 | 2 | 180.00 |
| OG2D1 | CG201 | NH1   | H     | 2.5000 | 2 | 180.00 |
| OG302 | CG201 | NH1   | CT1   | 1.6000 | 1 | 180.00 |
| OG2D1 | CG201 | NH1   | CT1   | 2.5000 | 2 | 180.00 |
| CG201 | NH1   | CT1   | CT2   | 0.0000 | 1 | 180.00 |
| CG201 | NH1   | CT1   | CD    | 0.0000 | 1 | 180.00 |
| CG201 | NH1   | CT1   | HB    | 0.0000 | 1 | 180.00 |
| H     | NH1   | CT1   | CT2   | 0.0000 | 1 | 0.00   |
| H     | NH1   | CT1   | CD    | 0.0000 | 1 | 0.00   |
| HB    | CT1   | NH1   | H     | 0.0000 | 1 | 0.00   |
| H     | OH1   | CT2   | CT1   | 1.3000 | 1 | 0.00   |
| H     | OH1   | CT2   | CT1   | 0.3000 | 2 | 0.00   |
| H     | OH1   | CT2   | CT1   | 0.4200 | 3 | 0.00   |
| X     | CT1   | CT2   | X     | 0.2000 | 3 | 0.00   |
| X     | CD    | OH1   | X     | 2.0500 | 2 | 180.00 |
| X     | CT1   | OH1   | X     | 0.0000 | 6 | 180.00 |
| X     | CT2   | OH1   | X     | 0.1400 | 3 | 0.00   |

## IMPROPERS

|       |   |   |       |        |   |      |
|-------|---|---|-------|--------|---|------|
| CG201 | X | X | OG2D1 | 120.00 | 0 | 0.00 |
| C2R61 | X | X | HGR61 | 15.00  | 0 | 0.00 |
| NH1   | X | X | H     | 20.00  | 0 | 0.00 |
| OB    | X | X | CD    | 100.00 | 0 | 0.00 |

NONBONDED nbxmod 5 atom cdie1 shift vatom vdistance vswitch -  
cutnb 14.0 ctofnb 12.0 ctonnb 10.0 eps 1.0 e14fac 1.0 wmin 1.5

|       |     |         |        |     |       |      |
|-------|-----|---------|--------|-----|-------|------|
| HGA2  | 0.0 | -0.0350 | 1.3400 |     |       |      |
| HGR61 | 0.0 | -0.0300 | 1.3582 |     |       |      |
| CG201 | 0.0 | -0.1100 | 2.0000 |     |       |      |
| C2R61 | 0.0 | -0.0700 | 1.9924 |     |       |      |
| C2R67 | 0.0 | -0.0700 | 1.9924 |     |       |      |
| C2RC0 | 0.0 | -0.0990 | 1.8600 |     |       |      |
| CG321 | 0.0 | -0.0560 | 2.0100 | 0.0 | -0.01 | 1.90 |
| C3C52 | 0.0 | -0.0600 | 2.0200 | 0.0 | -0.01 | 1.90 |
| OG2D1 | 0.0 | -0.1200 | 1.7000 | 0.0 | -0.12 | 1.40 |
| OG302 | 0.0 | -0.1000 | 1.6500 |     |       |      |
| H     | 0.0 | -0.0460 | 0.2245 |     |       |      |
| NH1   | 0.0 | -0.2000 | 1.8500 | 0.0 | -0.20 | 1.55 |
| HA    | 0.0 | -0.0220 | 1.3200 |     |       |      |
| HB    | 0.0 | -0.0220 | 1.3200 |     |       |      |
| OH1   | 0.0 | -0.1521 | 1.7700 |     |       |      |
| OB    | 0.0 | -0.1200 | 1.7000 | 0.0 | -0.12 | 1.40 |
| CT1   | 0.0 | -0.0200 | 2.2750 | 0.0 | -0.01 | 1.90 |
| CT2   | 0.0 | -0.0550 | 2.1750 | 0.0 | -0.01 | 1.90 |
| CD    | 0.0 | -0.0700 | 2.0000 |     |       |      |

END

**K<sub>ow</sub> DETERMINATION**

The experimental determination of the Fmoc-S-OMe  $K_{ow}$  was carried out using the shake-flask method. The concentrations of Fmoc-S-OMe in octanol and water were determined by fluorescence spectroscopy. The emission at 304 nm was calibrated in both solvents (Figure ESI 1) using samples of known concentrations. Emission was measured with a Jasco FP-6500 spectrofluorometer at 304 nm, using medium response with an excitation bandwidth of 3nm and an emission bandwidth of 3nm. Samples were measured with 1 cm pathlength cuvettes.

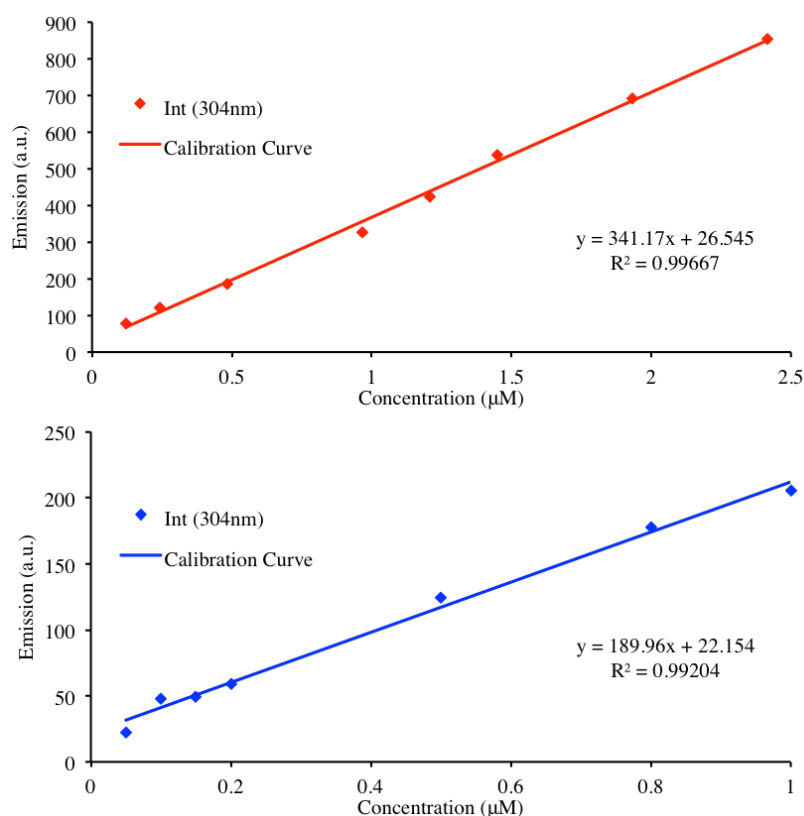

**Figure ESI-1.** Calibration of the emission intensity of Fmoc-S-OMe in octanol (Red) and in water (Blue) at different concentrations. The range of concentrations was estimated in previous experiments.

Samples for the partition coefficient determination used 2 mL of aqueous Fmoc-S-OMe stock solution (2.01 µM). After mixing them with 2 mL of octanol the mixture was shaken vigorously during 30 s and left resting for 2 hours. 1 mL of each phase was taken to measure fluorescence. Averaged results of 9 samples were used for the final determination of the  $K_{ow}$ .

**Table ESI-1.** Experimental results for the determination of the Fmoc-S-OMe partition coefficient ( $K_{ow}$ ).

|         | Intensity at 304 nm |         | Concentration (µM) |         | $K_{ow}$ |
|---------|---------------------|---------|--------------------|---------|----------|
|         | water               | octanol | water              | octanol |          |
| 1       | 40                  | 706     | 0.09               | 1.99    | 21.1     |
| 2       | 36                  | 692     | 0.07               | 1.95    | 27.3     |
| 3       | 35                  | 713     | 0.07               | 2.01    | 30.2     |
| 4       | 39                  | 704     | 0.09               | 1.99    | 23.2     |
| 5       | 35                  | 705     | 0.07               | 1.99    | 30.5     |
| 6       | 42                  | 770     | 0.10               | 2.18    | 21.7     |
| 7       | 35                  | 678     | 0.07               | 1.91    | 29.9     |
| 8       | 45                  | 701     | 0.12               | 1.98    | 16.8     |
| 9       | 47                  | 726     | 0.13               | 2.05    | 15.7     |
| Average |                     |         | 0.09               | 2.00    | 23.6     |
| STD Dev |                     |         | 0.02               | 0.08    | 5.5      |

The final log P or log  $K_{ow}$  value is  $-1.4 \pm 0.1$ . The confidence interval was calculated using equation Eq. ESI. 1:

$$Conf. Interval = \frac{s \cdot t(95\%)}{\sqrt{n}}$$

Where  $s$  is the standard deviation,  $t(95\%)$  is the confidence coefficient for a 95% of confidence level and  $n$  is the number of samples used.

### Fmoc-S-OMe SOLVATION FREE ENERGIES IN OCTANOL AND IN WATER

The free energy profile as a function of the decoupling of the Fmoc-S-OMe molecule from each solvent is shown in Figure ESI-2. The difference between the starting and the final point gives the solvation free energy of the solute in each solvent (Table ESI-2).

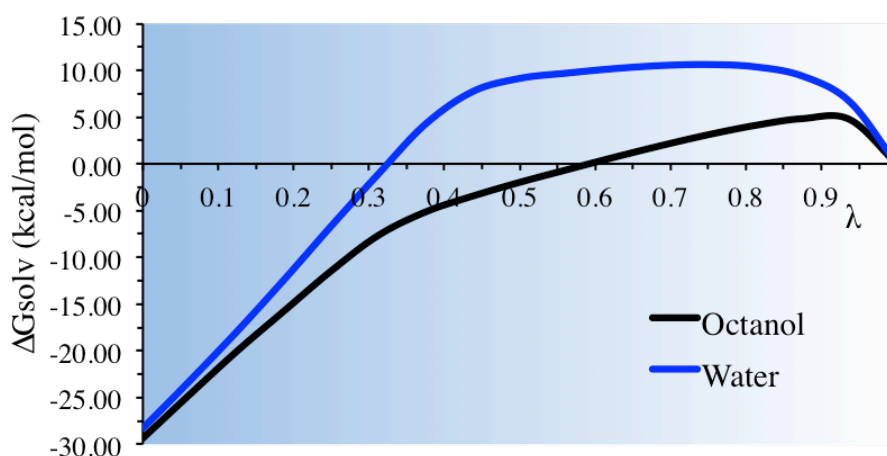

**Figure ESI-2.** Free energy profiles of the decoupling of Fmoc-S-OH to water and to octanol using MD-FEP.

**Table ESI-2.** MD-FEP results of the solvation free energies and the final water/octanol partition free energy ( $\Delta G_{ow}$ ).

| $\Delta G_{water}$ | $\Delta G_{octanol}$ | $\Delta G_{ow}$ |
|--------------------|----------------------|-----------------|
| $-28.3 \pm 0.1$    | $-29.3 \pm 0.3$      | $-1.0 \pm 0.2$  |

### Fmoc-S-OMe SOLVATION FREE ENERGIES USING FEP: Parameters Study

Prior to the calculation of the final values for the solvation free energies with the FEP different parameters were checked (Table ESI-3). To check the reliability of the results the overlap between the forward and backward simulation was evaluated (Figure ESI-3). It can be seen how the set of FEP parameters used for the calculation of the solvation free energies give the best overlap between both, the forward and the backward, simulations.

**Table ESI-3.** FEP parameters used in the calculations which results are shown in Figure ESI-3. \* The parameters P-4 were used for final results presented in this study.

| Parameters Set | $d\lambda$ | Number of windows | Equilibration steps/window | Total steps/window |
|----------------|------------|-------------------|----------------------------|--------------------|
| P-1            | 0.1        | 10                | 2,500                      | 52,500             |
| P-2            | 0.1        | 10                | 30,000                     | 630,000            |
| P-3            | 0.1        | 10                | 500,000                    | 5,500,000          |
| P-4            | 0.0625     | 16                | 250,000                    | 4,250,000          |

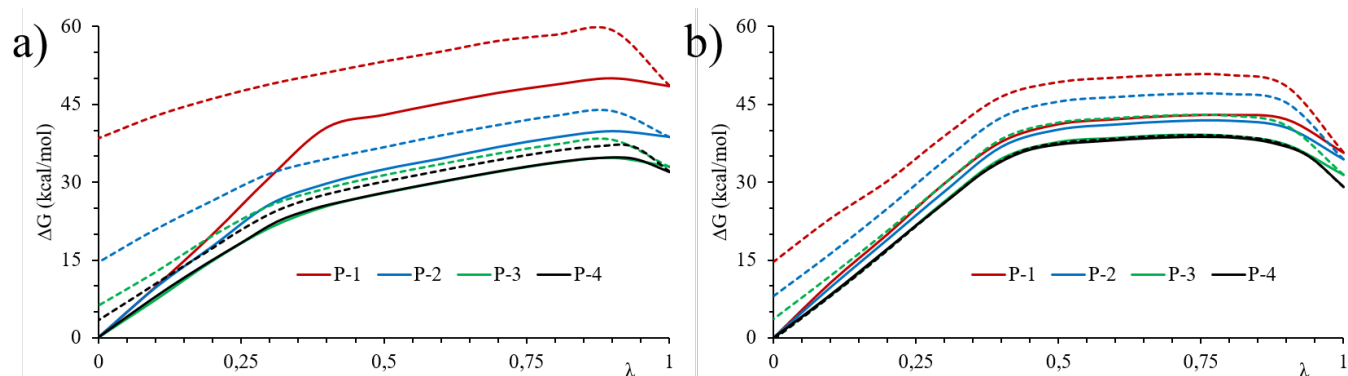

**Figure ESI-3.** Forward (straight lines) and backward (dashed lines) free energy profiles for the solvation of Fmoc-S-OMe in octanol (a) and in water (b) with the different FEP parameters shown in Table ESI-3.

### Fmoc-S-OH PARTICLE SIZE DISTRIBUTION

The AFM image published by Abul-Haija *et al.* was used to carry out the particle size distribution analysis of the Fmoc-S-OH micelles.<sup>1</sup>

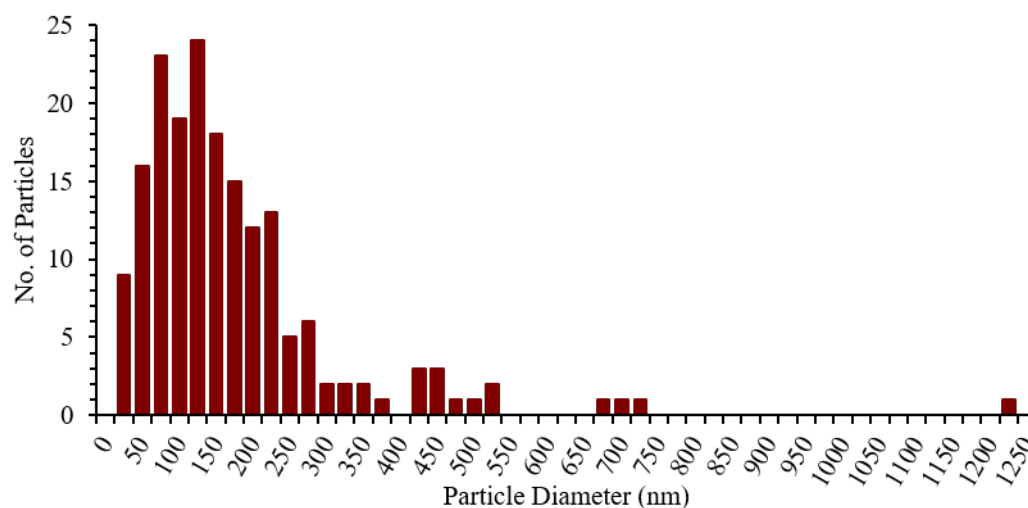

**Figure ESI-4.** Particle size distribution analysis made on Fmoc-S-OH AFM image from ref. 1.



**Fmoc-S-OH MD SIMULATION**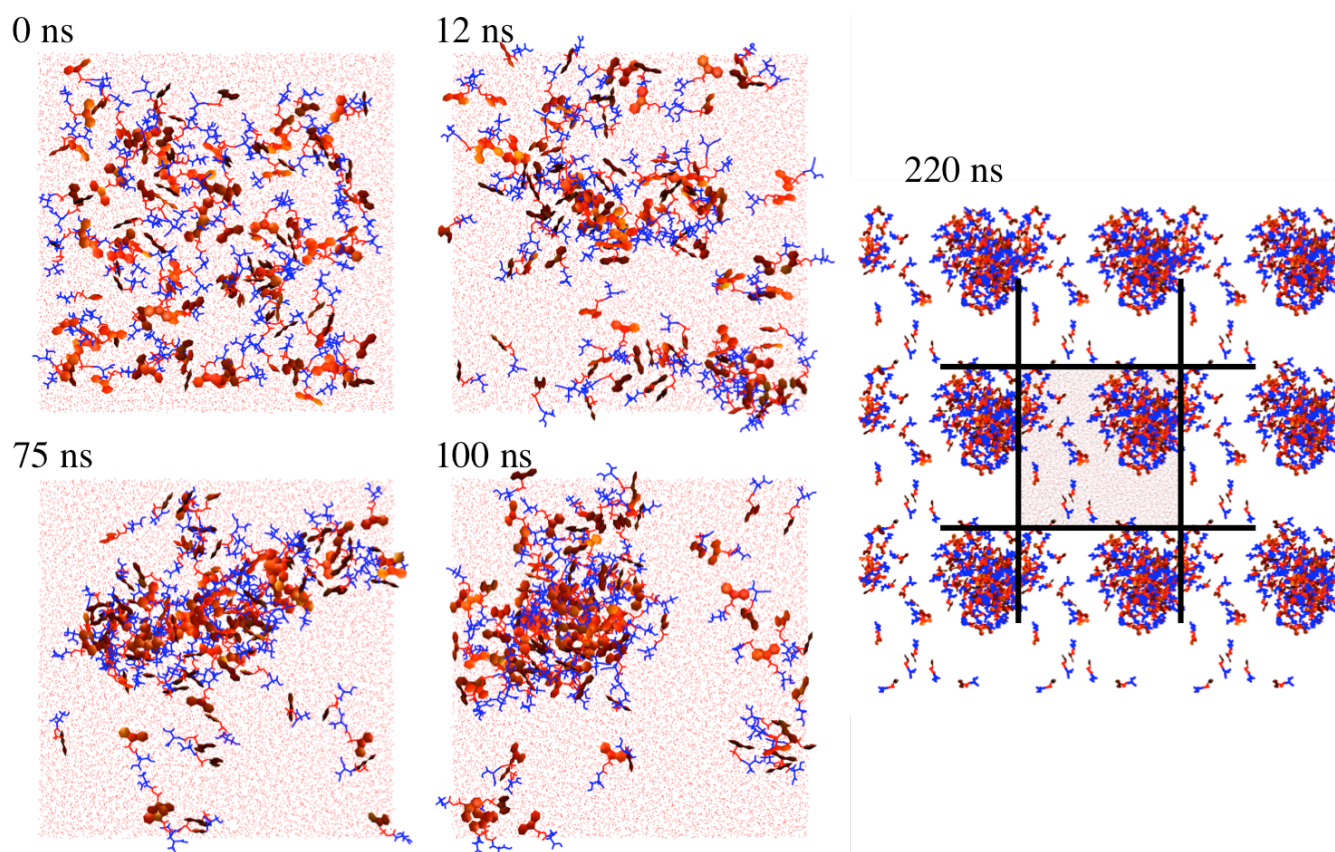

**Figure ESI-5.** Snapshots of the Fmoc-S-OH simulation (Fmoc in red and S-OH in blue). The last snapshot (220 ns) shows also the periodic images in the xy-plane for clarity.

## Fmoc-Y-OH MD SIMULATION

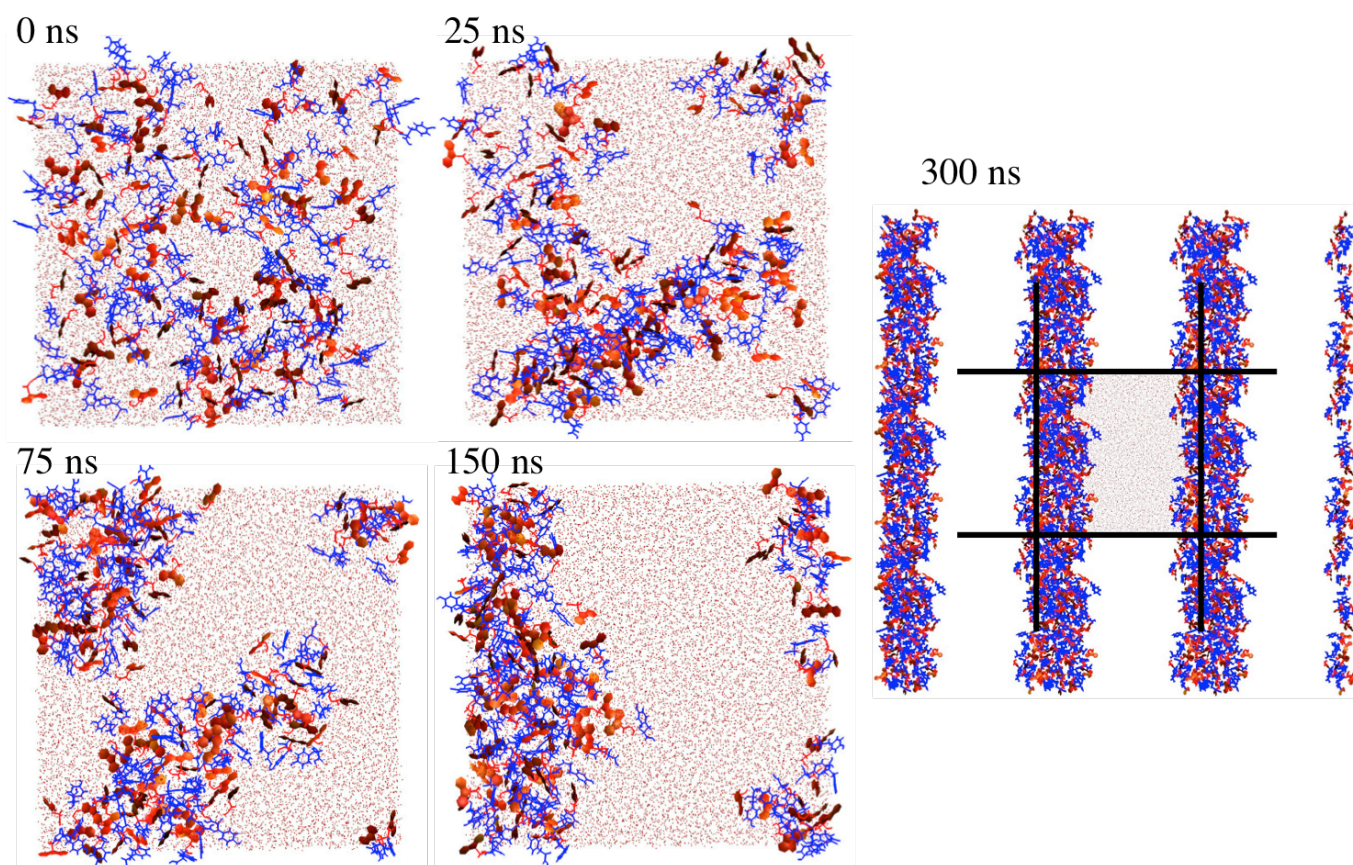

**Figure ESI-6.** Snapshots of the Fmoc-Y-OH simulation (Fmoc in red and Y-OH in blue). The last snapshot (300 ns) shows also the periodic images in the xy-plane for clarity.

1. Y. M. Abul-Haija, S. Roy, P. W. Frederix, N. Javid, V. Jayawarna and R. V. Ulijn, *Small*, 2014, **10**, 973-979.
